# Supplementary material for: Synthesis, Characterization, and Sensitivity of a CL-20/PNCB Spherical Composite for Security
Source: MDPI journal article supplement (doi:10.3390/ma11071130), 2018-07-03
Supplement: s1 [file s1]

# Synthesis, Characterization, and Sensitivity of a CL-20/PNCB Spherical Composite for Security

Yanfang Zhu,<sup>1</sup> Yuewen Lu,<sup>1</sup> Bing Gao,<sup>1</sup> Dunju Wang,<sup>1</sup> Changping Guo<sup>\*1</sup> & Guangcheng Yang<sup>2</sup>

<sup>1</sup> Sichuan Co-Innovation Center for New energetic materials, Southwest University of Science and Technology (SWUST), Mianyang 621010, China

<sup>2</sup> Institute of Chemical Materials, China Academy of Engineering Physics (CAEP), Mianyang 621900, China

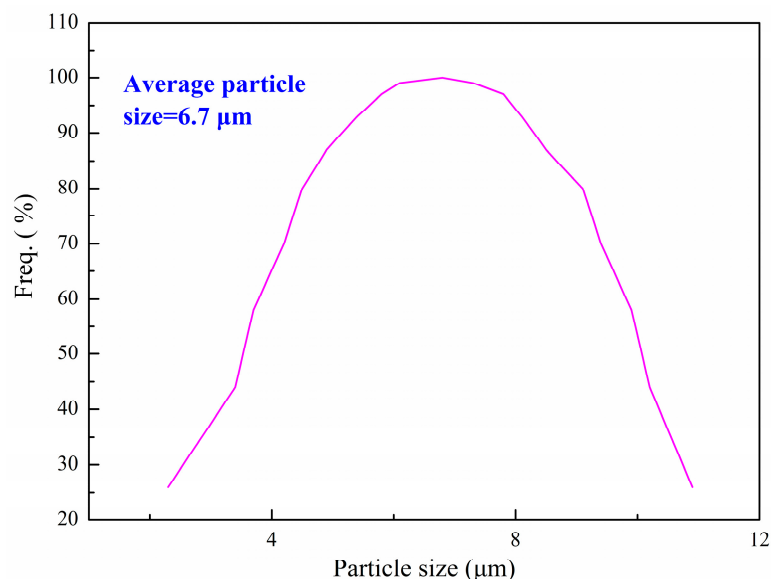

**Figure S1.** Particle size distribution of as-formed CL-20/PNCB composite.

We also make a comparable table with all explosive properties (e.g, DSC, sensitivity, VOD and DP, etc.) of already known composites with CL-20.

**Table S1.** Impact sensitivity, detonation velocity and detonation pressure of CL-20 based composite.

| CL-20 Based Composite or Co-Crystal | Impact Sensitivity | Detonation Velocity (m/s) | Detonation Pressure (GPa) |
|-------------------------------------|--------------------|---------------------------|---------------------------|
| CL-20/DNB [1]                       | 55 cm              | 8434                      | 34.0                      |
| CL-20/TNT [2]                       | 30 cm              | 8426                      | 32.3                      |
| CL-20/TATB [3]                      | /                  | 9127                      | 41.3                      |
| CL-20/BTF [4]                       | /                  | 8969                      | 39.1                      |
| As-prepared CL-20/PNCB              | 63cm               |                           |                           |

## Thermal analysis:

CL-20/DNB: There are two exothermic peaks at 216.8 °C and 242.8 °C, respectively.

CL-20/TNT: In the DSC curve, the co-crystal has a narrow endothermic peak with onset at 134°C, which is denoted as the melting point of the co-crystal. Two obvious and rapid weight losses occur in the temperature ranges of 214–221 °C and 238–249 °C for the co-crystal, respectively.

CL-20/TATB: The peak at 208.15 °C may demonstrate the phase transition temperature of the co-crystal. The DSC profile curve reveals a strong exothermic peak at 231.8 °C.

CL-20/BTF: The DSC profile in the DSC curve reveals a strong exothermic peak at 235 °C, attributed to the decomposing event of the cocrystal.

## References

1. Wang, Y.P., Yang, Z.W., Li, H.Z., Wang, J.H., Zhou, X.Q., Zhang, Q. A novel cocrystal explosive of HNIW with good comprehensive properties. *Propellants, Explos., Pyrotech.* **2014**, 39, 590–596.
2. Yang, Z.W., Li, H.Z., Huang, H., Zhou, X.Q., Li, J.S., Nie, F.D. Preparation and performance of a HNIW/TNT cocrystal explosive. *Propellants, Explos., Pyrotech.* **2013**, 38, 495–501.
3. Xu, H.F., Duan, X.H., Li, H.Z., Pei, C.H. A novel high-energetic and good-sensitive cocrystal composed of CL-20 and TATB by a rapid solvent/non-solvent method. *RSC Adv.* **2015**, 5, 95764–95770.
4. Yang, Z.W., Li H.Z., Zhou X.Q., Zhang C.Y., Huang H., Li J.S., Nie F.D. Characterization and Properties of a Novel Energetic–Energetic Cocrystal Explosive Composed of HNIW and BTF. *Cryst. Growth Des.* **2012**, 12, 5155–5158.
